# Supplementary material for: Structural engineering of metal–organic framework derived tin sulfides for advanced Li/Na storage
Source: Royal Society of Chemistry journal article supplement (doi:10.1039/d1ta01768c), 2021-01-01
Supplement: d1ta01768c1.pdf [file d1ta01768c1.pdf]

# Structural Engineering of Metal-organic Framework Derived Tin Sulfides for Advanced Li/Na Storage

*Qiaohuan Cheng, and Xuebin Yu\**

Department of Materials Science, Fudan University, Shanghai 200433, P. R. China

\*Corresponding Author: E-mail: [yuxuebin@fudan.edu.cn](mailto:yuxuebin@fudan.edu.cn) (X. B. Yu)

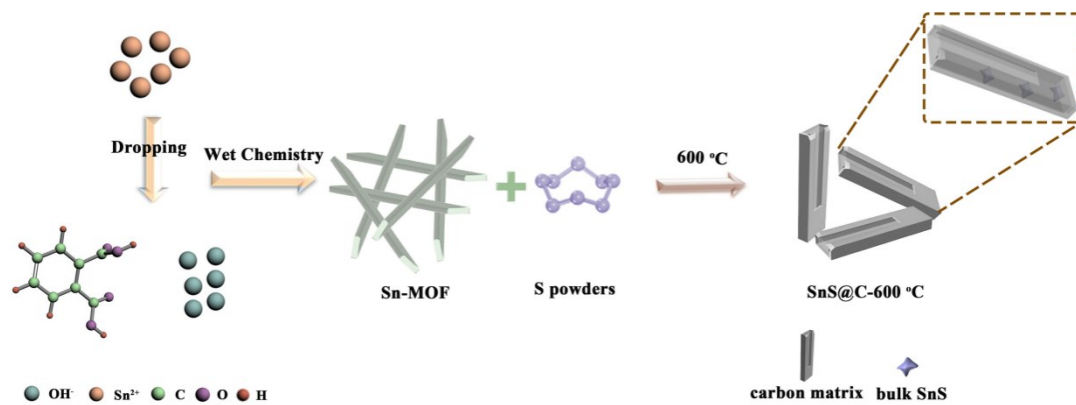

**Fig. S1** Schematic illustration of the fabrication process of SnS@C-600 °C.

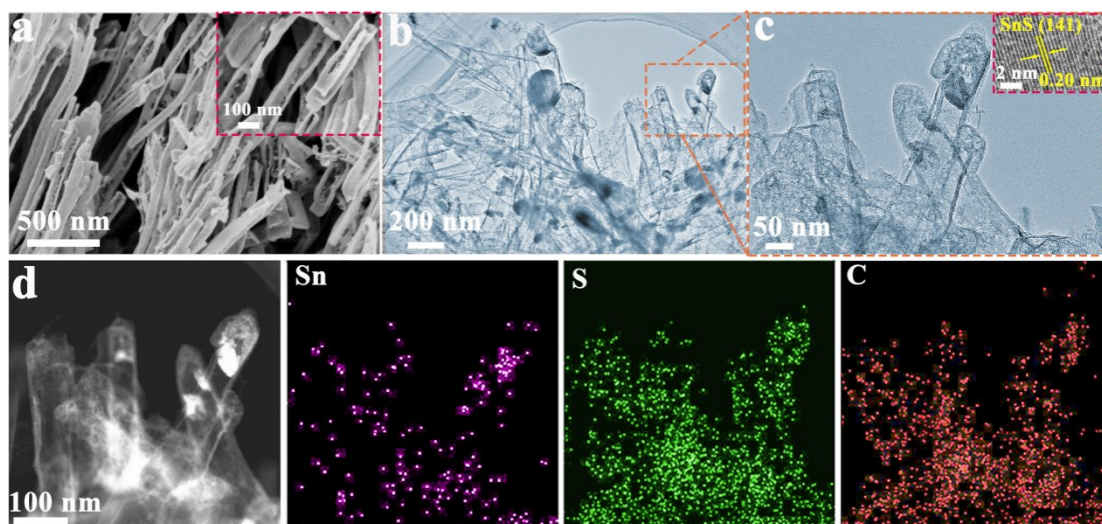

**Fig. S2** Morphology characterization of SnS@C-600 °C. (a) SEM image, (b) TEM image, (c) HRTEM image and (d) STEM image and the elemental mappings of SnS@C-600 °C. The inset of (a) and (c) are SEM and HRTEM images of SnS@C-600 °C, respectively.

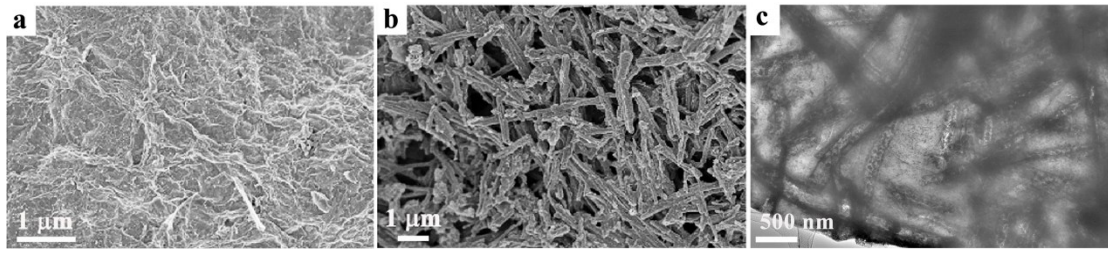

Fig. S3 SEM images of (a) SnS@C/rGO and (b) SnS@NC, (c) TEM image of SnS@NC.

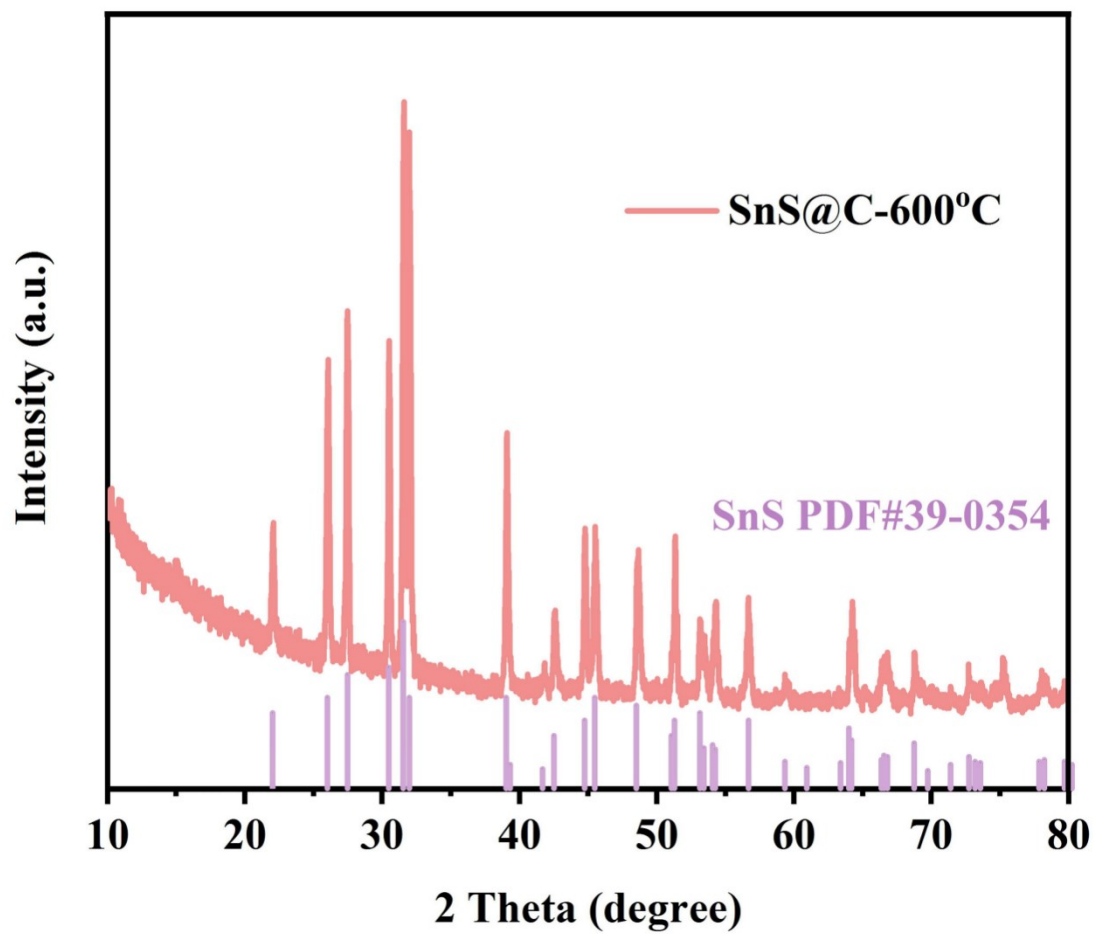

Fig. S4 XRD pattern of SnS@C-600 °C.

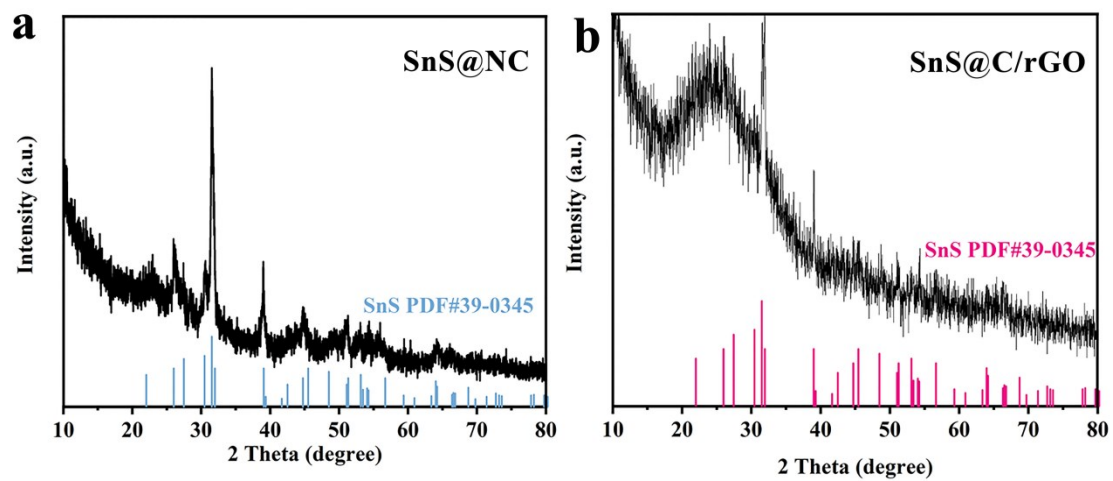

**Fig. S5** XRD patterns of (a) SnS@NC and (b) SnS@C/rGO.

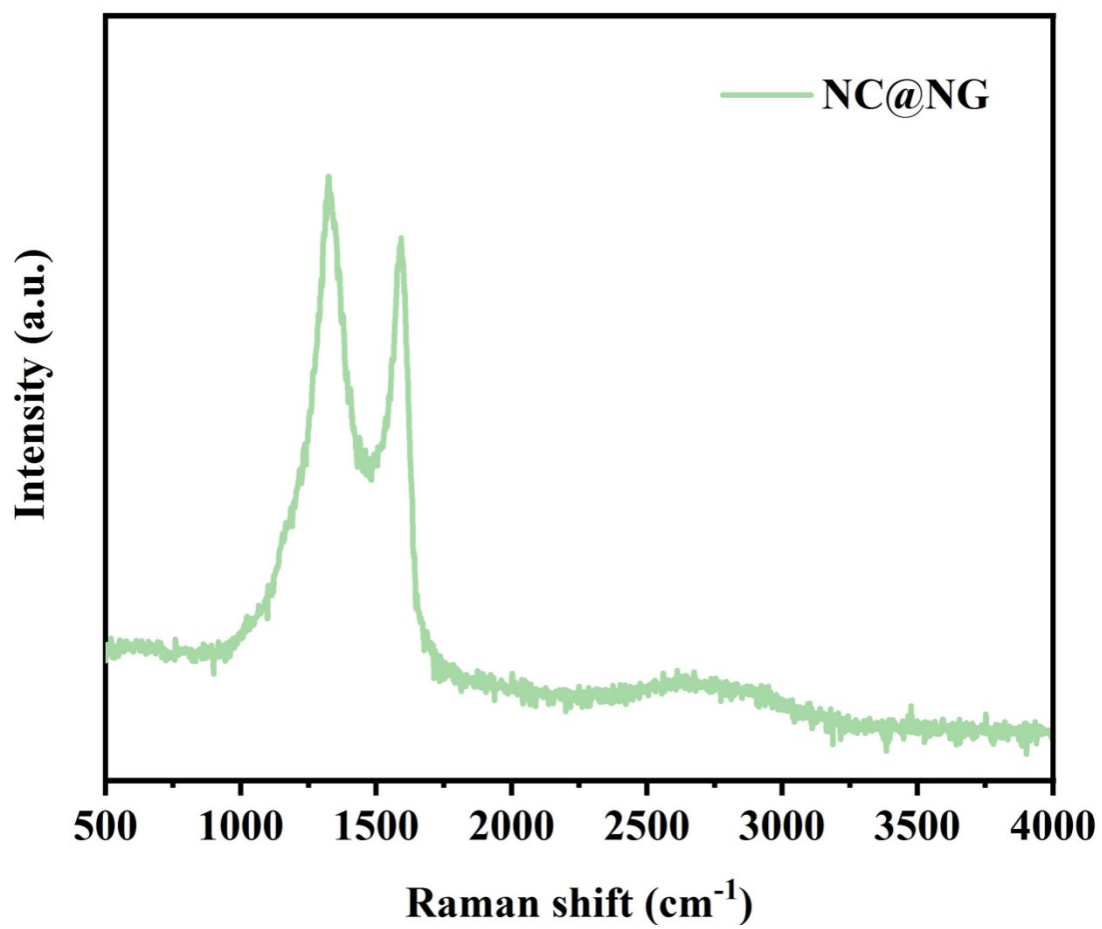

Fig. S6 Raman scattering spectrum of NC@NG.

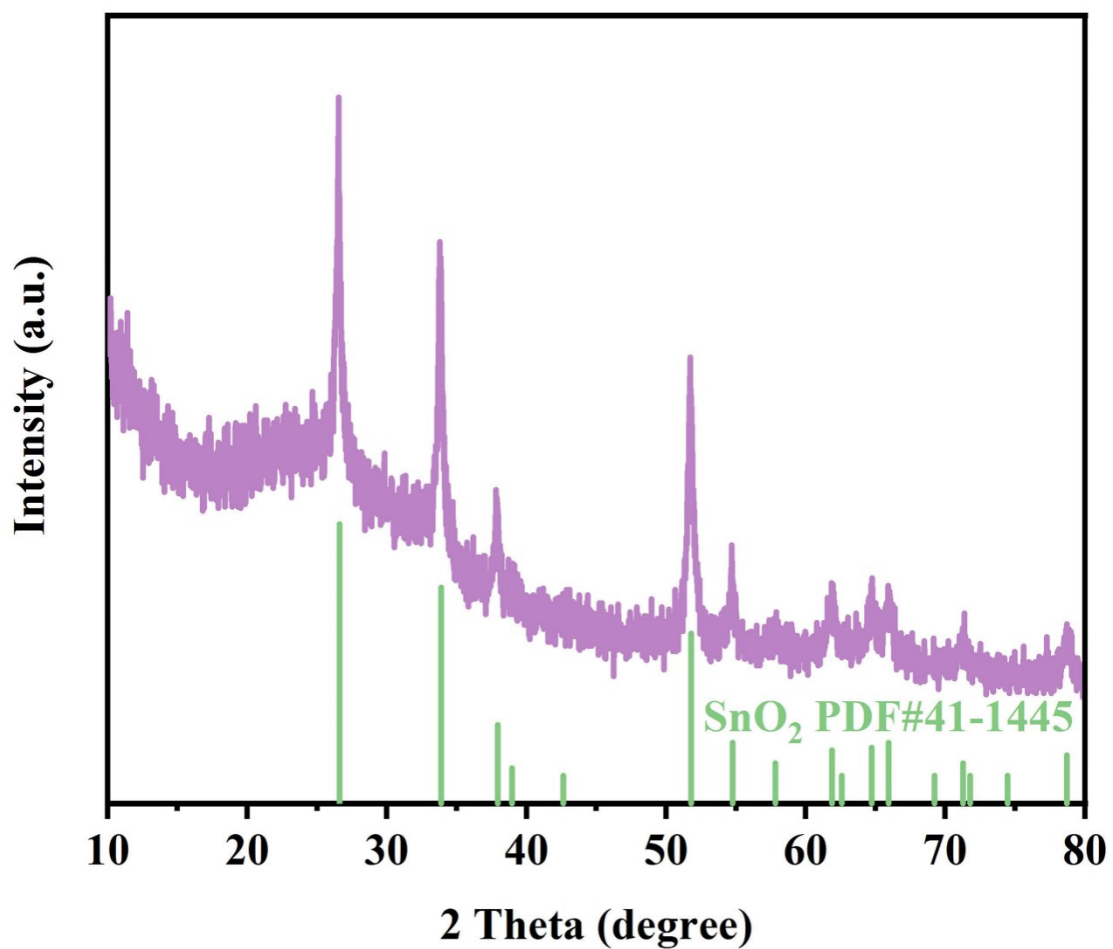

**Fig. S7** XRD pattern of powers obtained by calcining SnS@NC@NG in air to 800 °C (the XRD patterns of all samples after being calcined in air to 800 °C are the same with this pattern except for intensity).



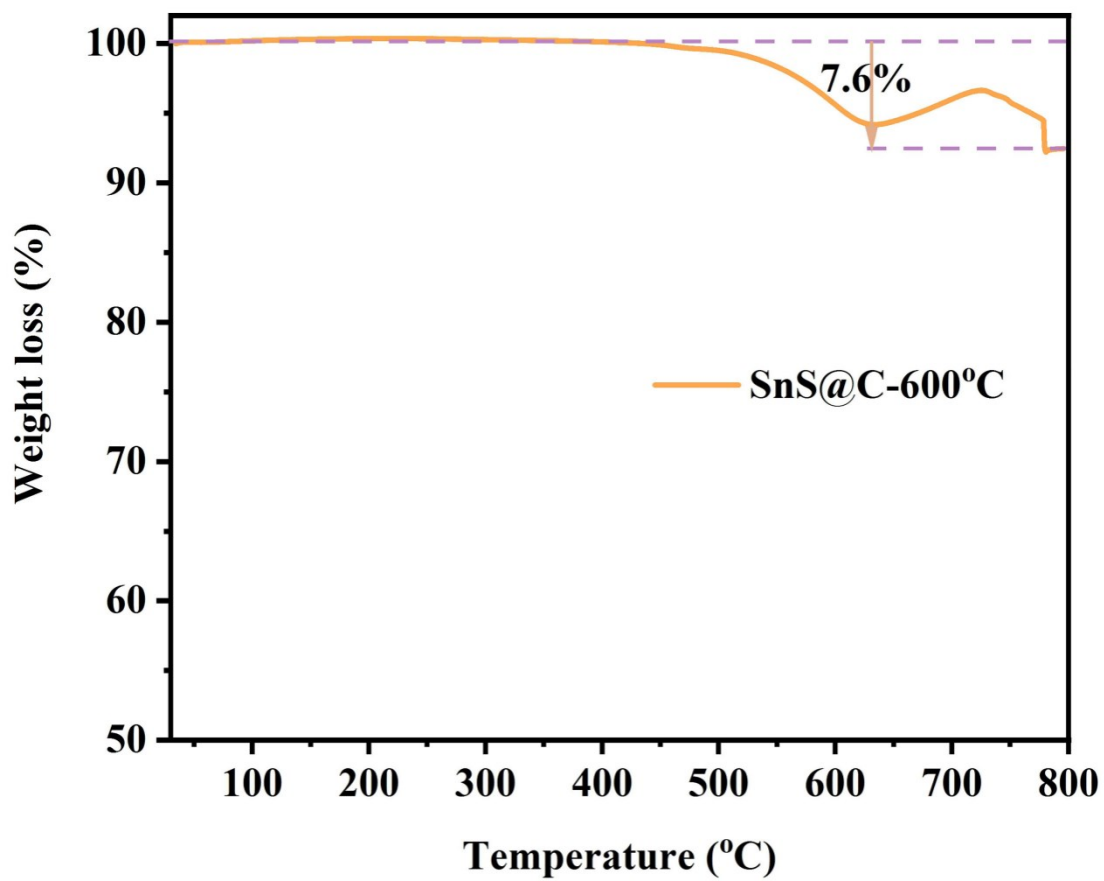

Fig. S8 TGA curve of SnS@C-600 °C.

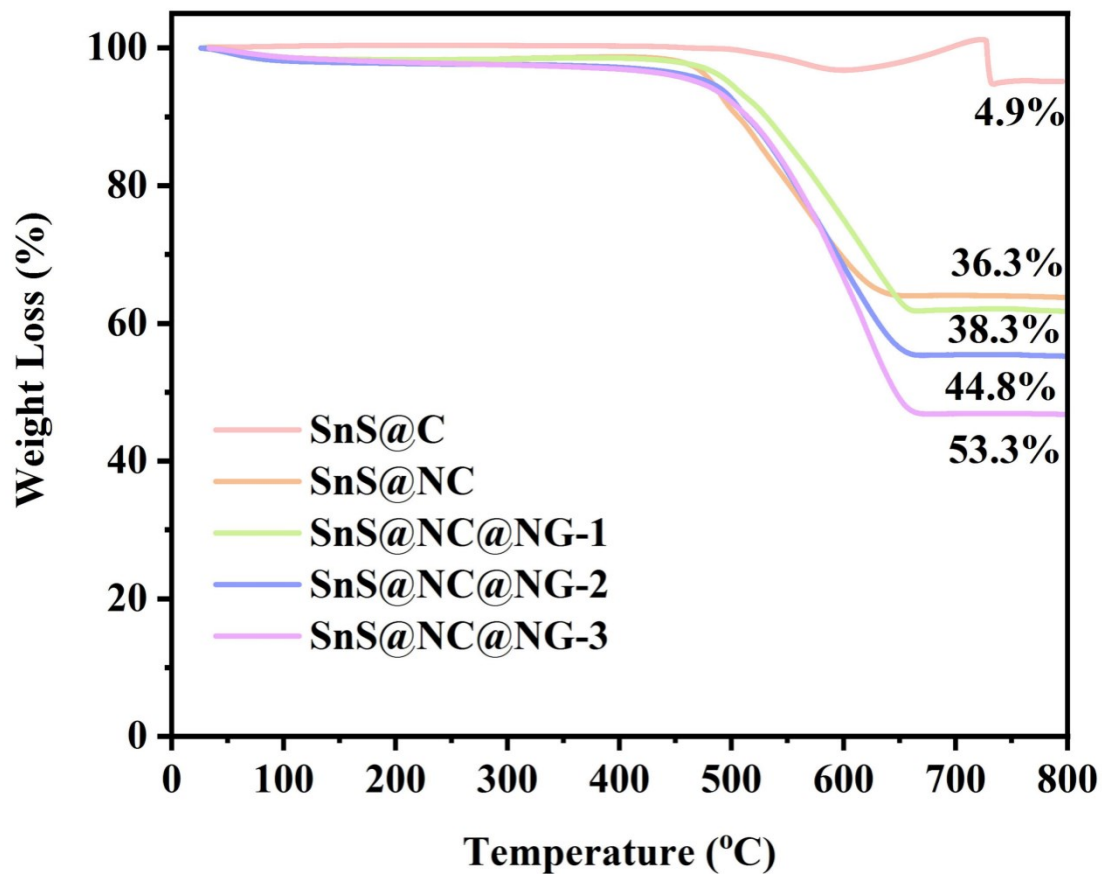

**Fig. S9** TGA curves of SnS@C, SnS@NC, SnS@NC@NG-1, SnS@NC@NG-2 and SnS@NC@NG-3, respectively.

The NG content of SnS@NC@NG-1, SnS@NC@NG-2 and SnS@NC@NG-3 is calculated to be 2 wt%, 8.5 wt% and 17 wt%, respectively.

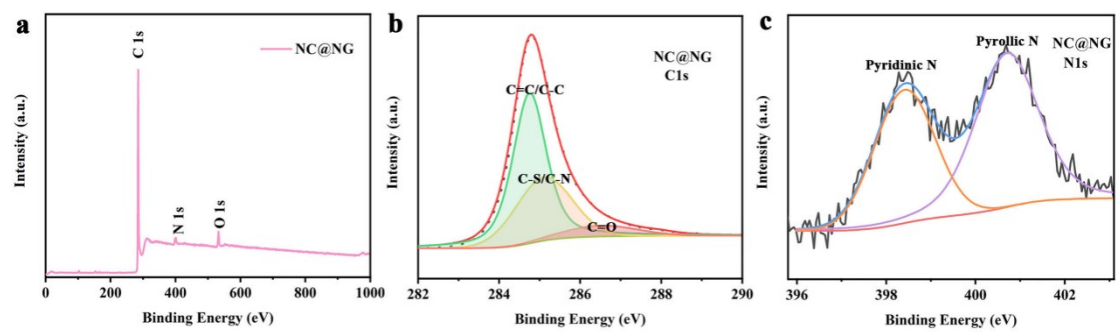

**Fig. S10** XPS survey of the NC@NG (a) and its high-resolution spectra: (b) C 1s and (c) N 1s.

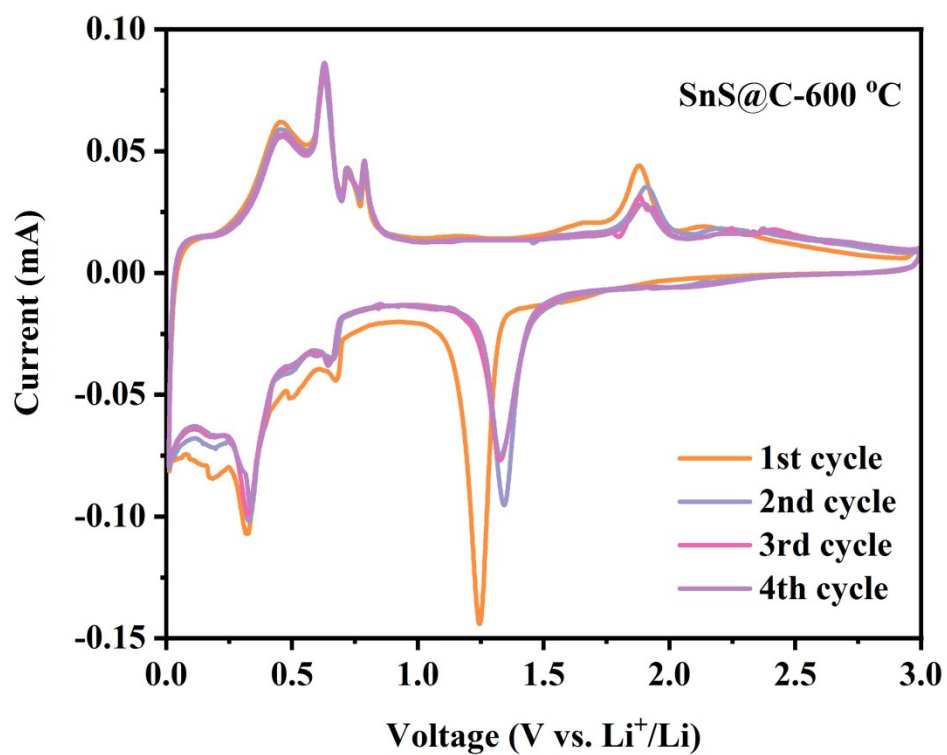

Fig. S11 CV curves of SnS@C-600 °C at 0.1 mV s<sup>-1</sup>.

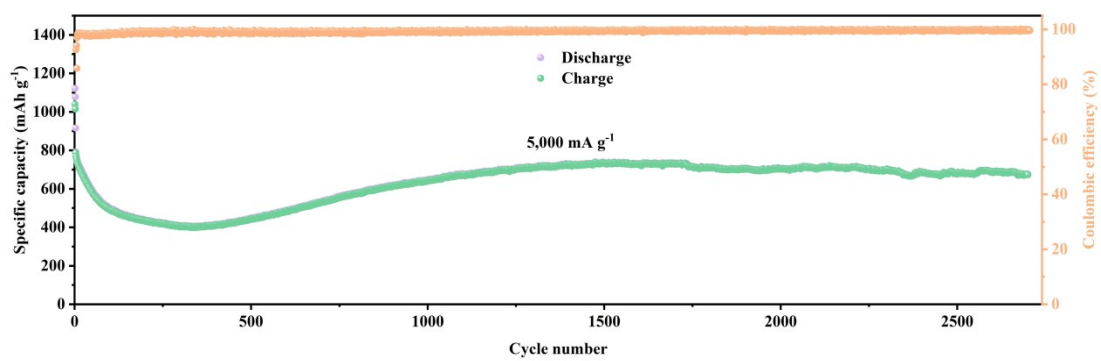

**Fig. S12** Cycling performance of SnS@C-600 °C at a current density of 5 A g<sup>-1</sup> for LIBs.

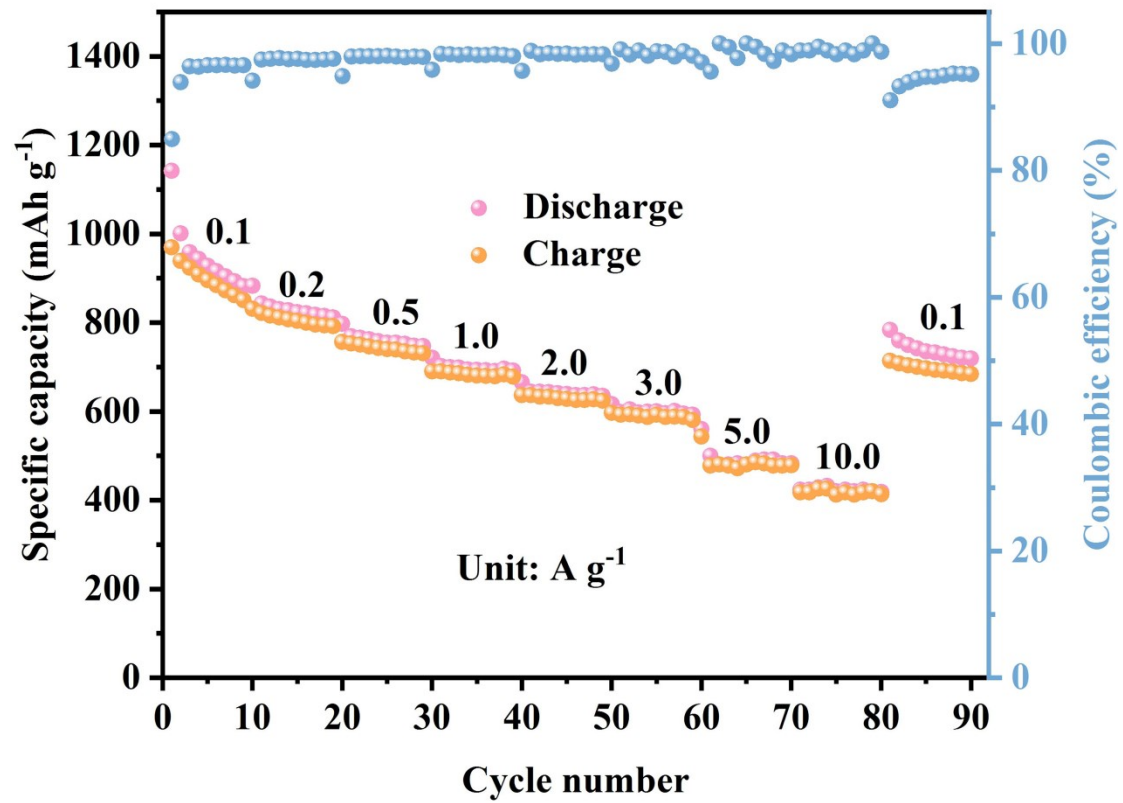

Fig. S13 Rate performance of SnS@C-600 °C at various current density for LIBs.

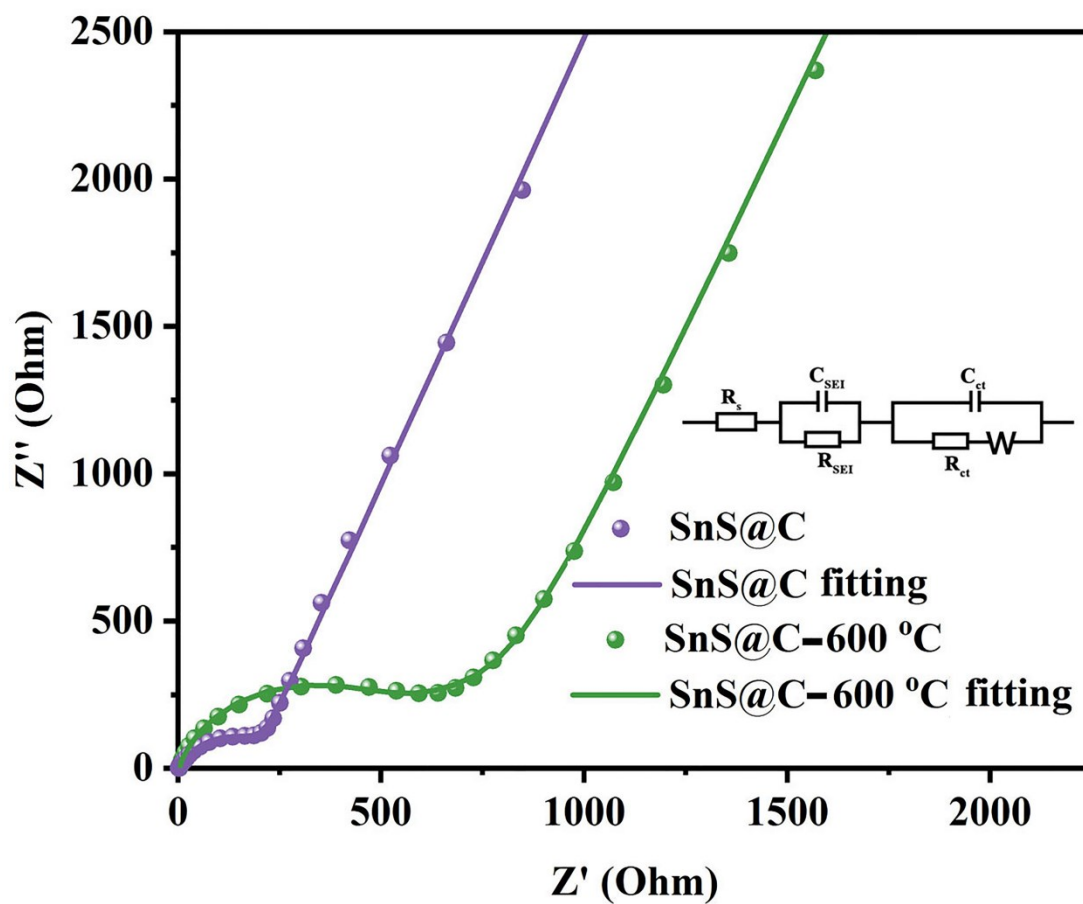

**Fig. S14** Nyquist plots and equivalent circuit model for SnS@C and SnS@C-600 °C anodes for LIBs.

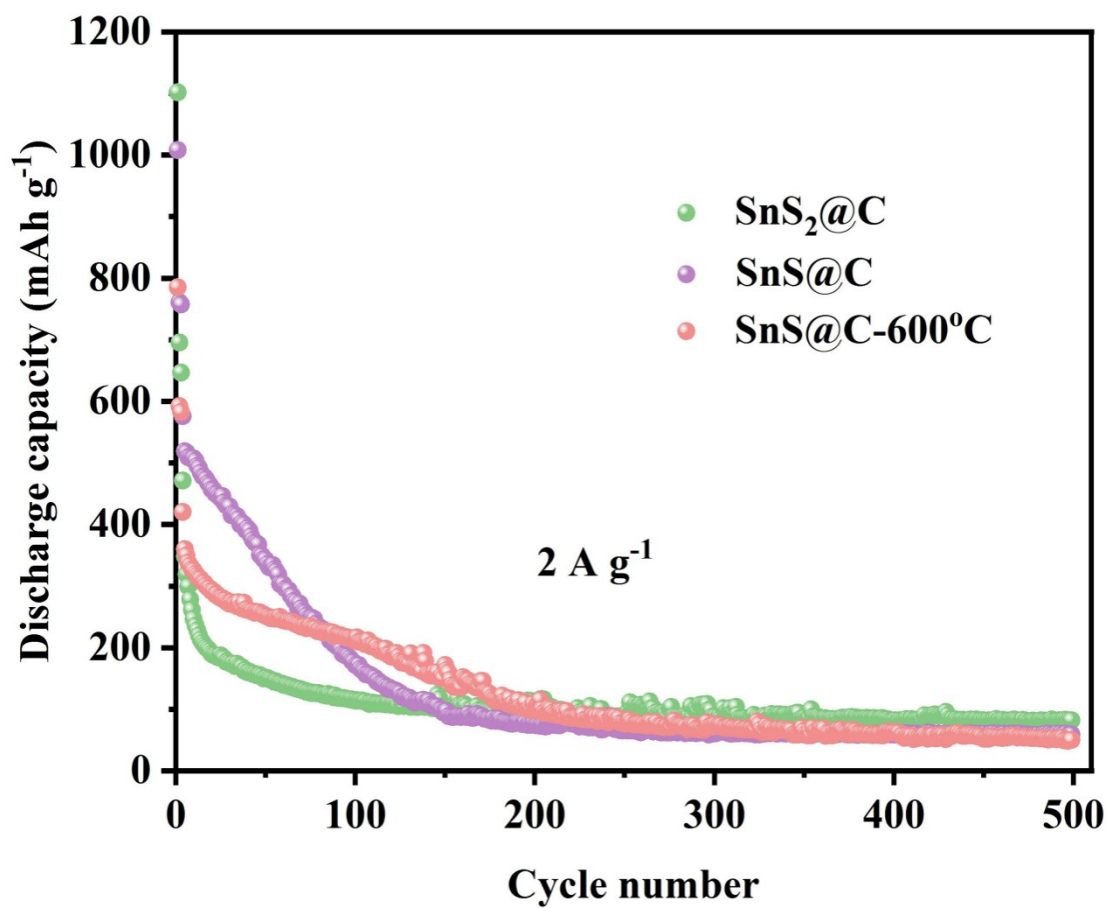

Fig. S15 Cycling performances of SnS<sub>2</sub>@C, SnS@C and SnS@C-600 °C at a current density of 2 A g<sup>-1</sup>.



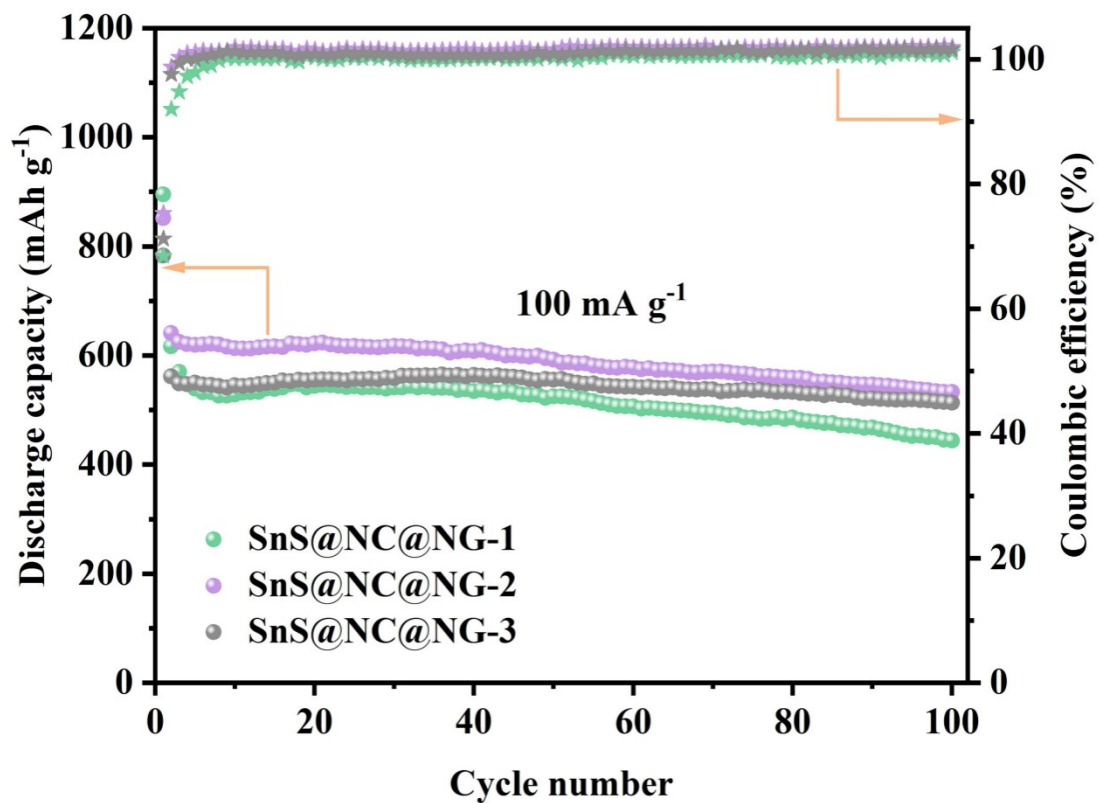

**Fig. S16** Cycling performances of SnS@NC@NG with various NG content (SnS@NC@NG-1, SnS@NC@NG-2 and SnS@NC@NG-3) at a current density of 100 mA g<sup>-1</sup> for NIBs.

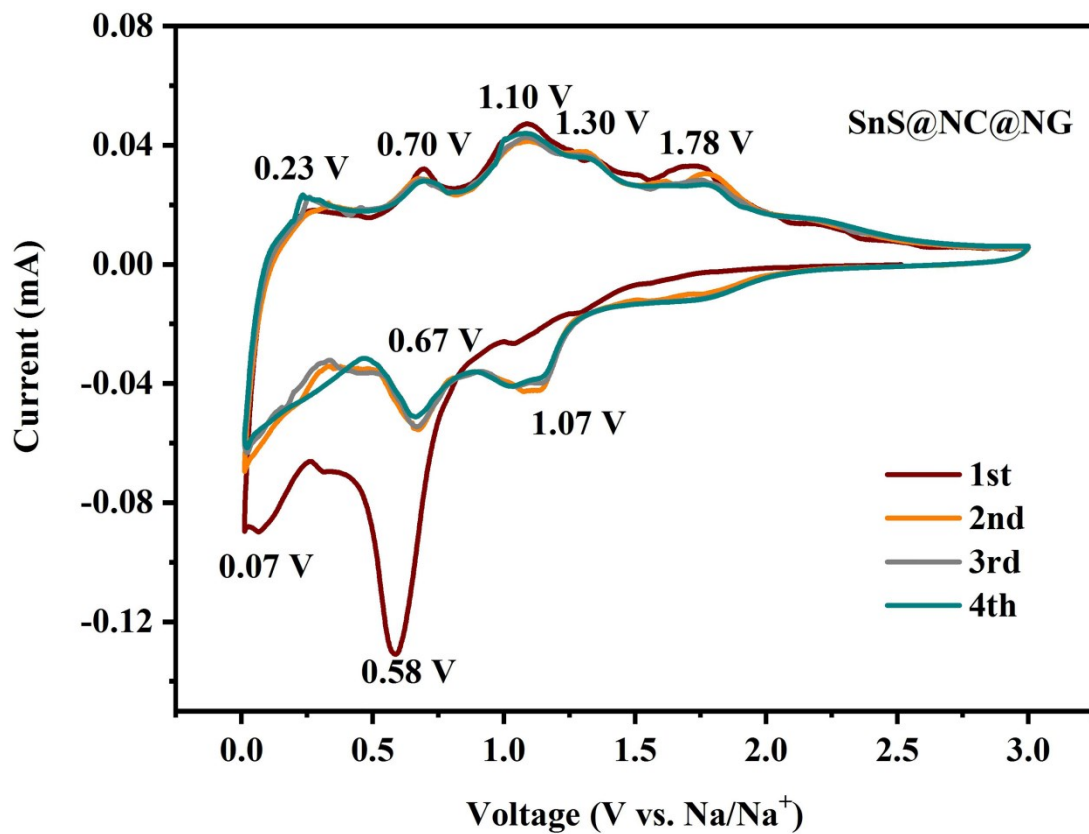

**Fig. S17** Cyclic voltammograms profiles of SnS@NC@NG for NIBs at a scan rate of 0.1 mV s<sup>-1</sup>.

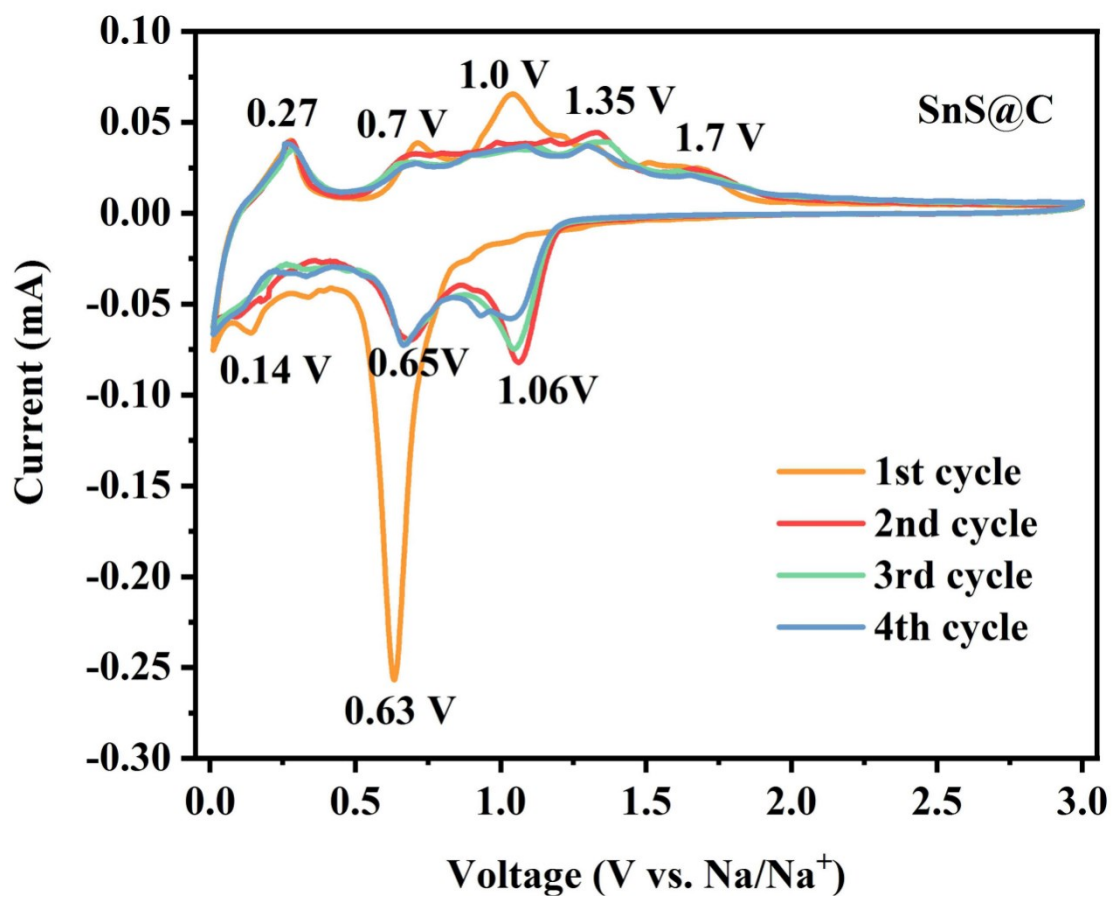

Fig. S18 Cyclic voltammograms profiles of SnS@C for NIBs at a scan rate of 0.1 mV s<sup>-1</sup>.

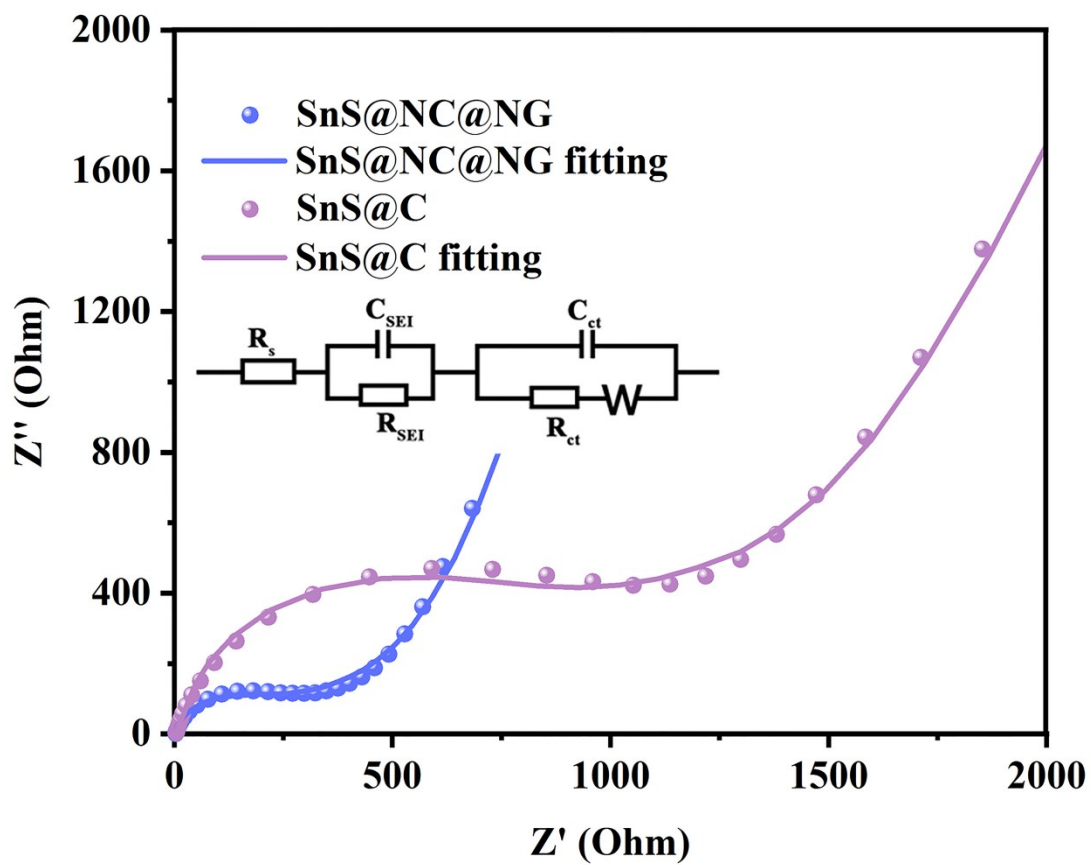

**Fig. S19** Nyquist plots and equivalent circuit model for SnS@C and SnS@C-600 °C anodes for LIBs.

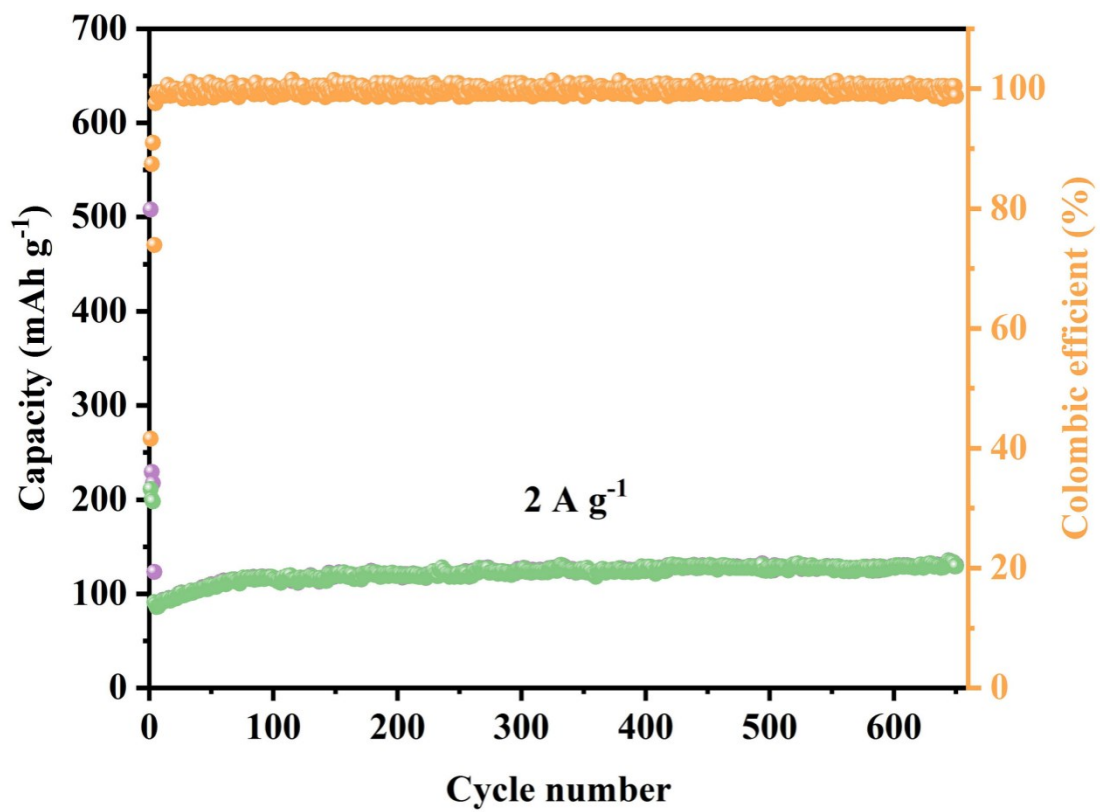

Fig. S20 Cycling performance of NC@NG for NIBs at 2 A g<sup>-1</sup>.

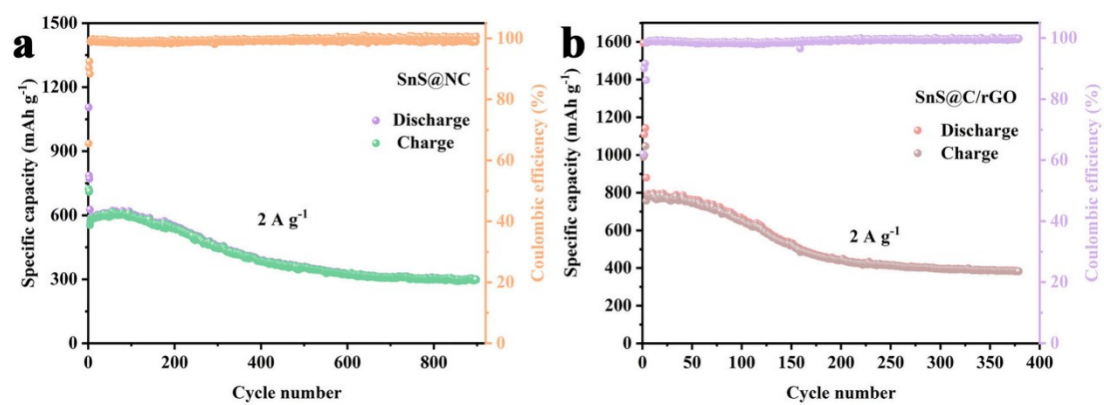

**Fig. S21** Cycling performances of (a) SnS@NC and (b) SnS@C/rGO at current density of 2 A g<sup>-1</sup> for NIBs.

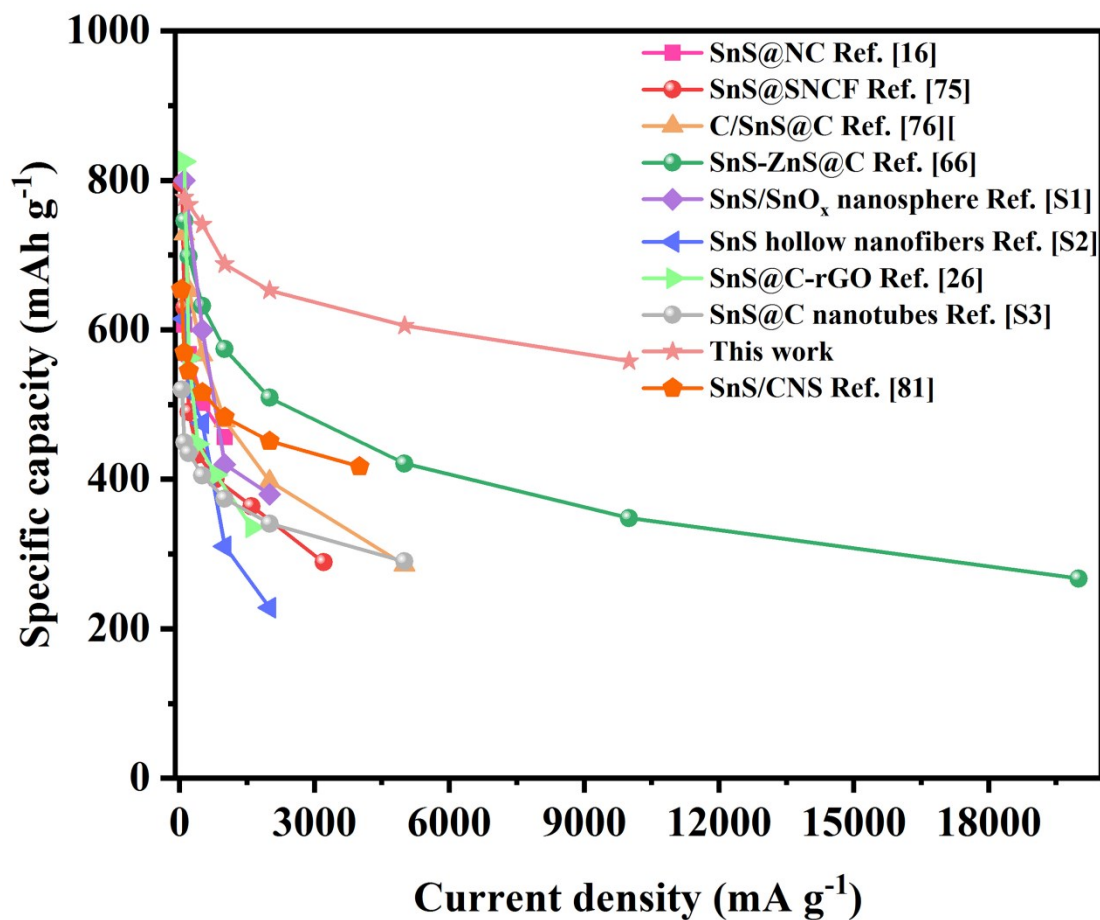

**Fig. S22** Comparison of rate performance for NIBs between SnS@NC@NG electrode and the recently reported values for typical SnS-based anode materials.

#### Supplementary references

- S1 H. Bian, Z. Li, X. Xiao, P. Schmuki, J. Lu and Y. Y. Li, *Adv. Funct. Mater.*, 2019, **259**, 1901000.
- S2 H. Jia, M. Dirican, N. Sun, C. Chen, P. Zhu, C. Yan, X. Dong, Z. Du, J. Guo, Y. Karaduman, J. Wang, F. Tang, J. Tao and X. Zhang, *Chem. Commun.*, 2019, **55**, 505-508.
- S3 P. He, Y. J. Fang, X.-U. Yu and X. W. Lou, *Angew. Chem. Int. Ed.*, 2017, **56**, 12202-12205.
